# Supplementary material for: Electrochemical CO2-reduction to Formate over Activated Carbon-Supported Transition Metals (M = Cu, Fe, Zn, Ni, Co)-based High-Entropy Oxide
Source: Research Square preprint supplement (doi:10.21203/rs.3.rs-7159044/v1), 2025-08-19
Supplement: Supplementary file 1 [file 3c52ca348aafb0dcef6071c2.docx]

**Electrochemical CO2-reduction to Formate over Activated Carbon-Supported**

**Transition Metals (M = Cu, Fe, Zn, Ni, Co)-based High-Entropy Oxide**

Naveen Kumar Vermaa,b, Basker Sundararajuc, and Nishith Vermaa,d,*

*aDepartment of Chemical Engineering, Indian Institute of Technology Kanpur, Kanpur- 208016, India.*

*bDepartment of Petroleum Engineering, Rajasthan Technical University Kota, Kota-324010, India.*

*cDepartment of Chemistry, Indian Institute of Technology Kanpur, Kanpur-208016, India.*

*dCenter for Environmental Science and Engineering, Indian Institute of Technology Kanpur, Kanpur-208016, India.*

*Corresponding author:

Prof. Nishith Verma (Email id: vermanishith@gmail.com)


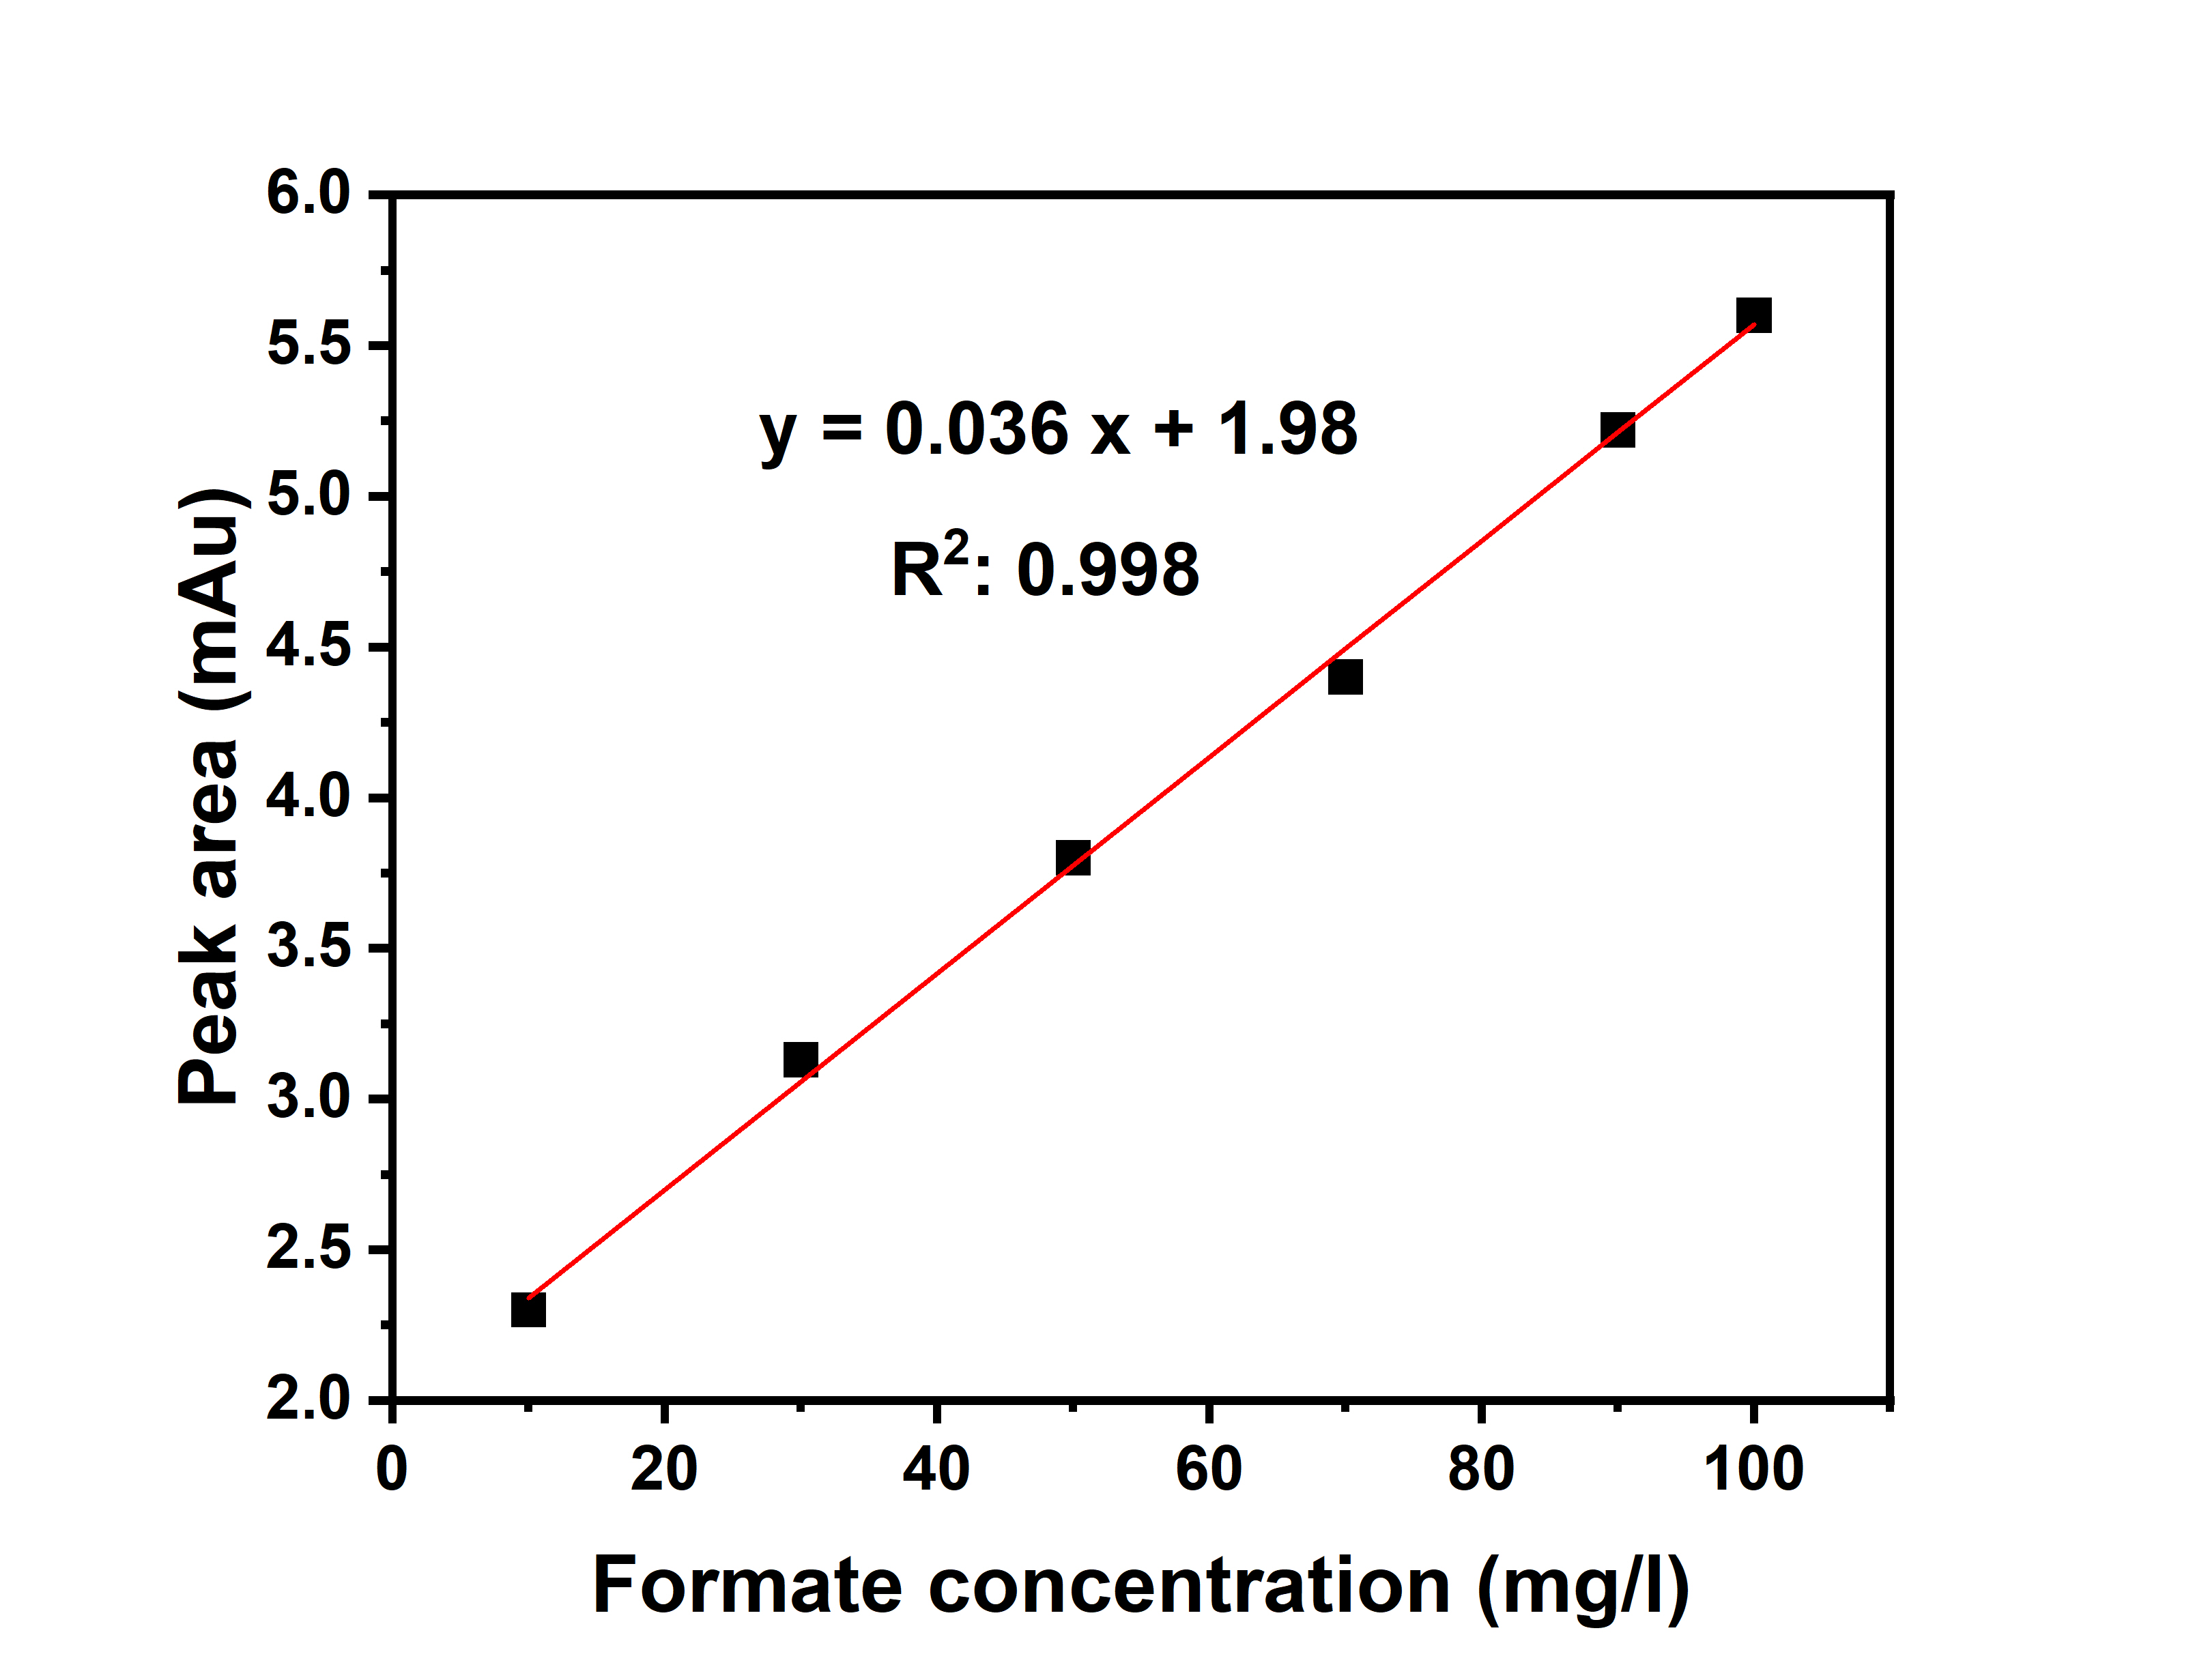


**Fig. S1** Calibration data for formate using HPLC.


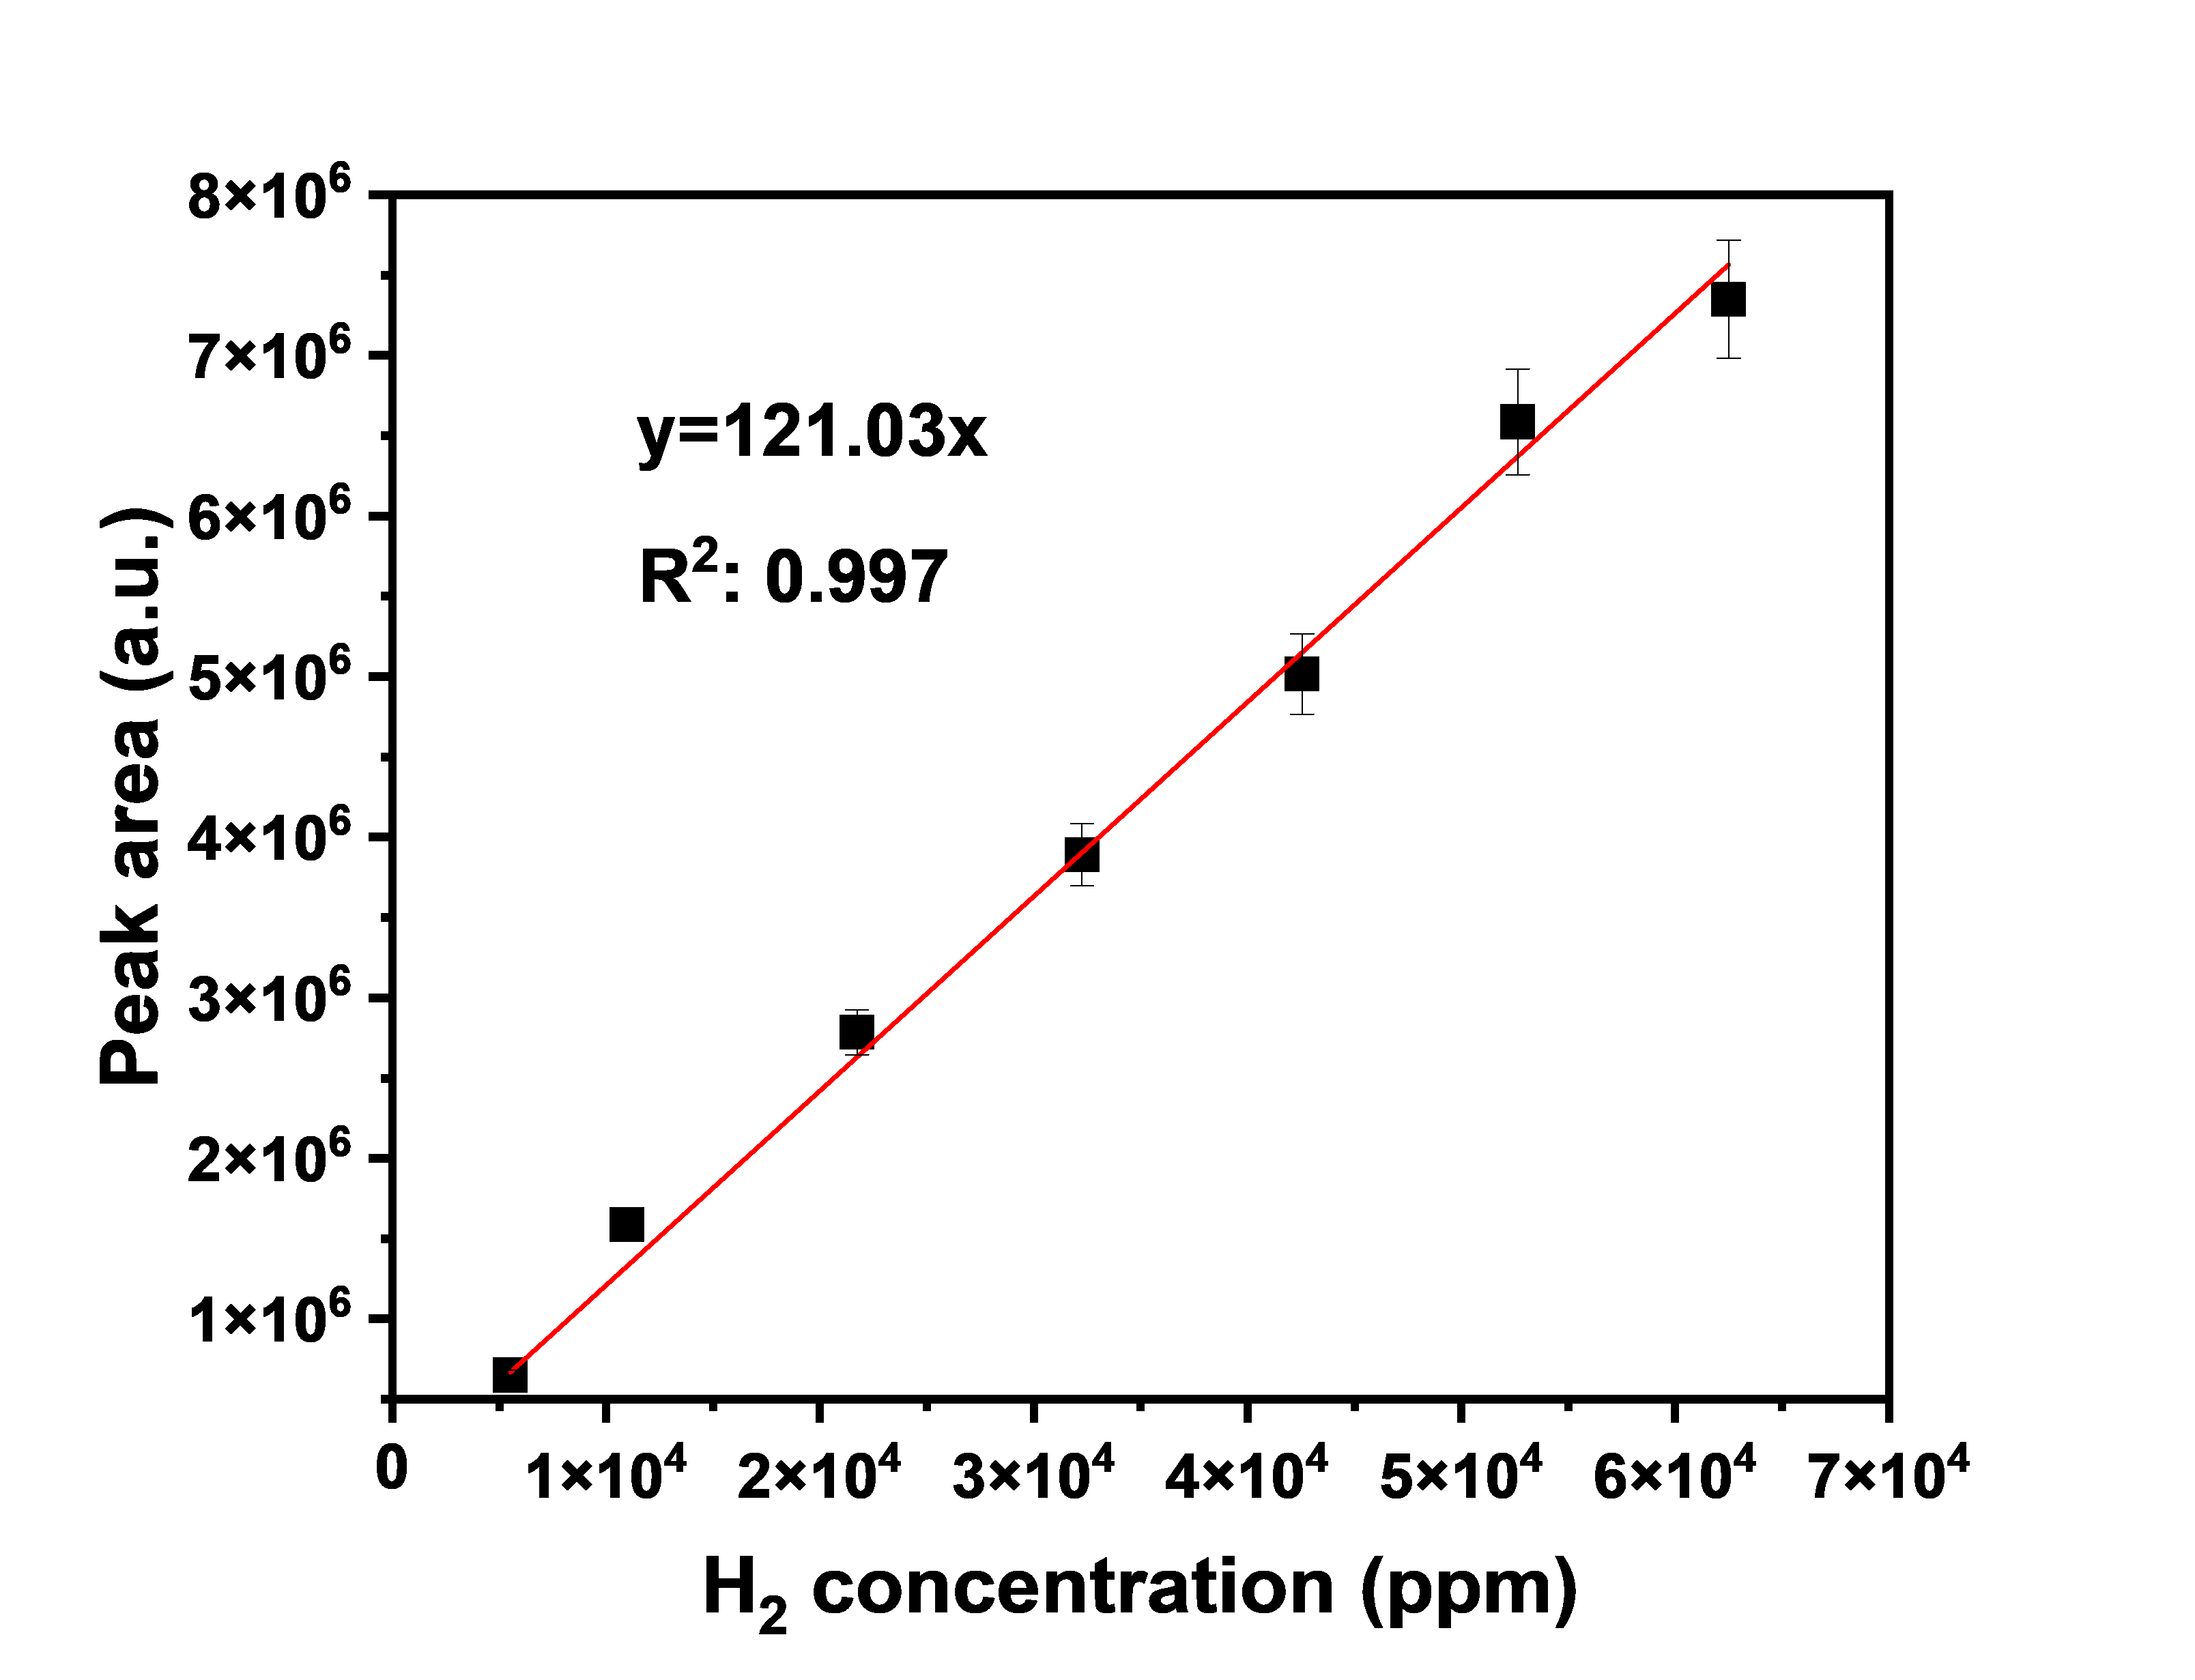


**Fig. S2** Calibration data for hydrogen gas using gas chromatography.


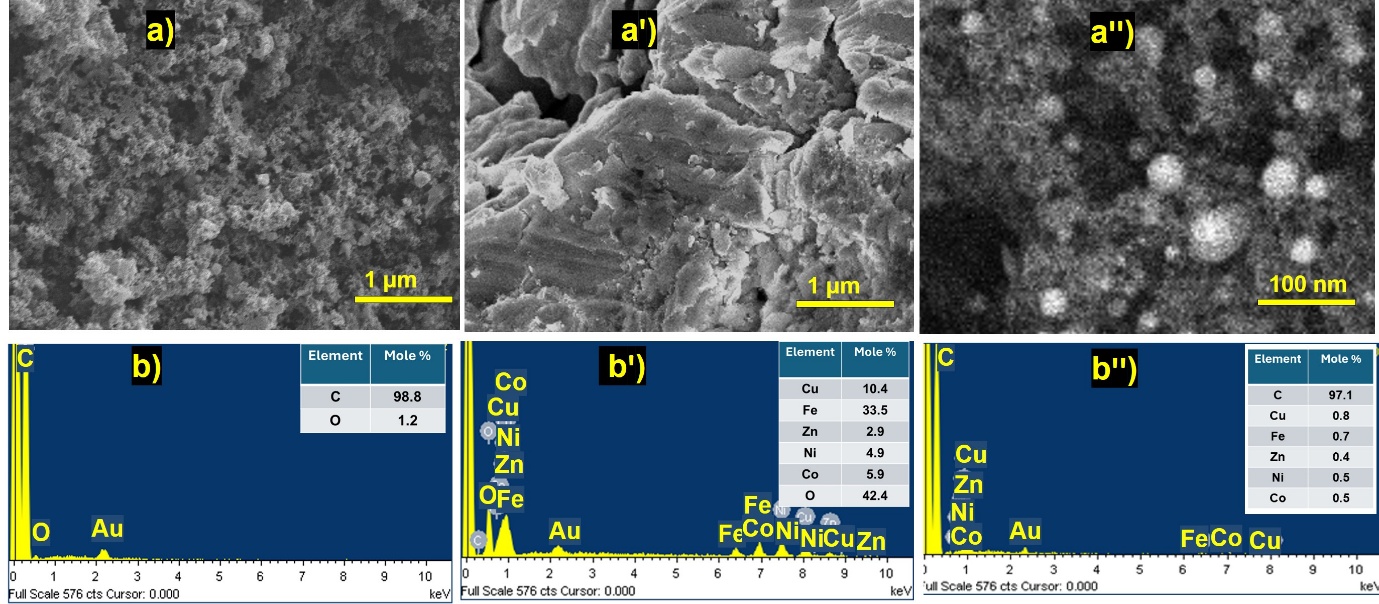


**Fig. S3 (**a, aꞌ, and aꞌꞌ) SEM images and (b, bꞌ, and bꞌꞌ) EDS spectra of ACP, CFZN-O, and CFZNC-HEA/ACP, respectively.


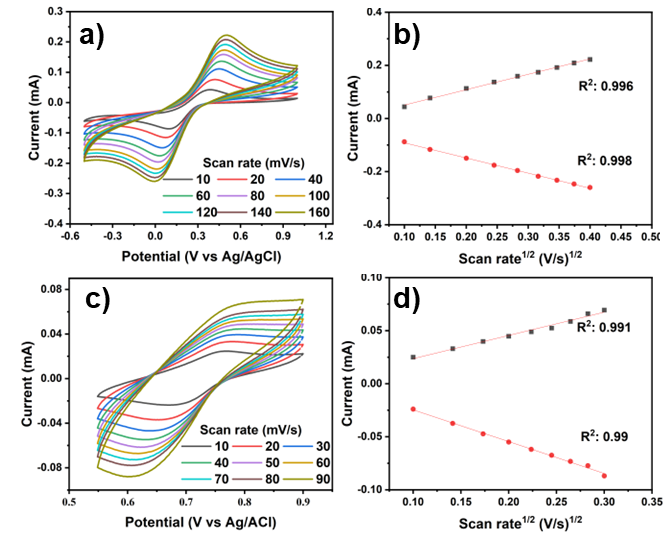


**Fig. S4:** CV and RS equation (line) for ECSA calculations: (a-b) CFZNC-O and c-d) ACP.


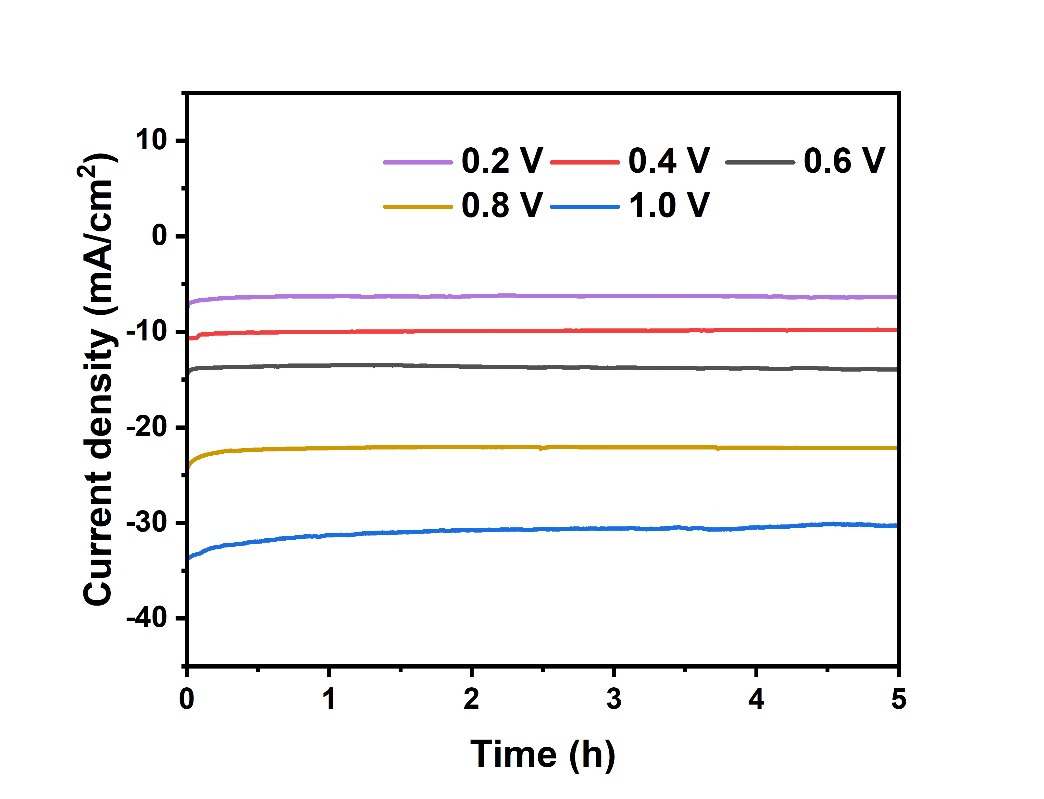


Fig. S5: Chronoamperometry test for CFZNC-HEO/ACP at different applied potentials.


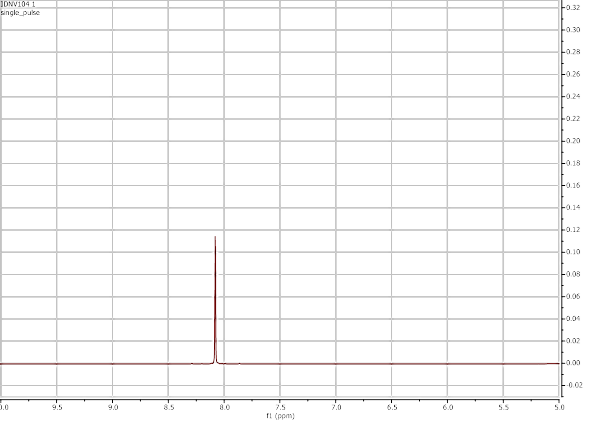


Fig. S6 1H-NMR spectra of eCRR liquid product (formate).


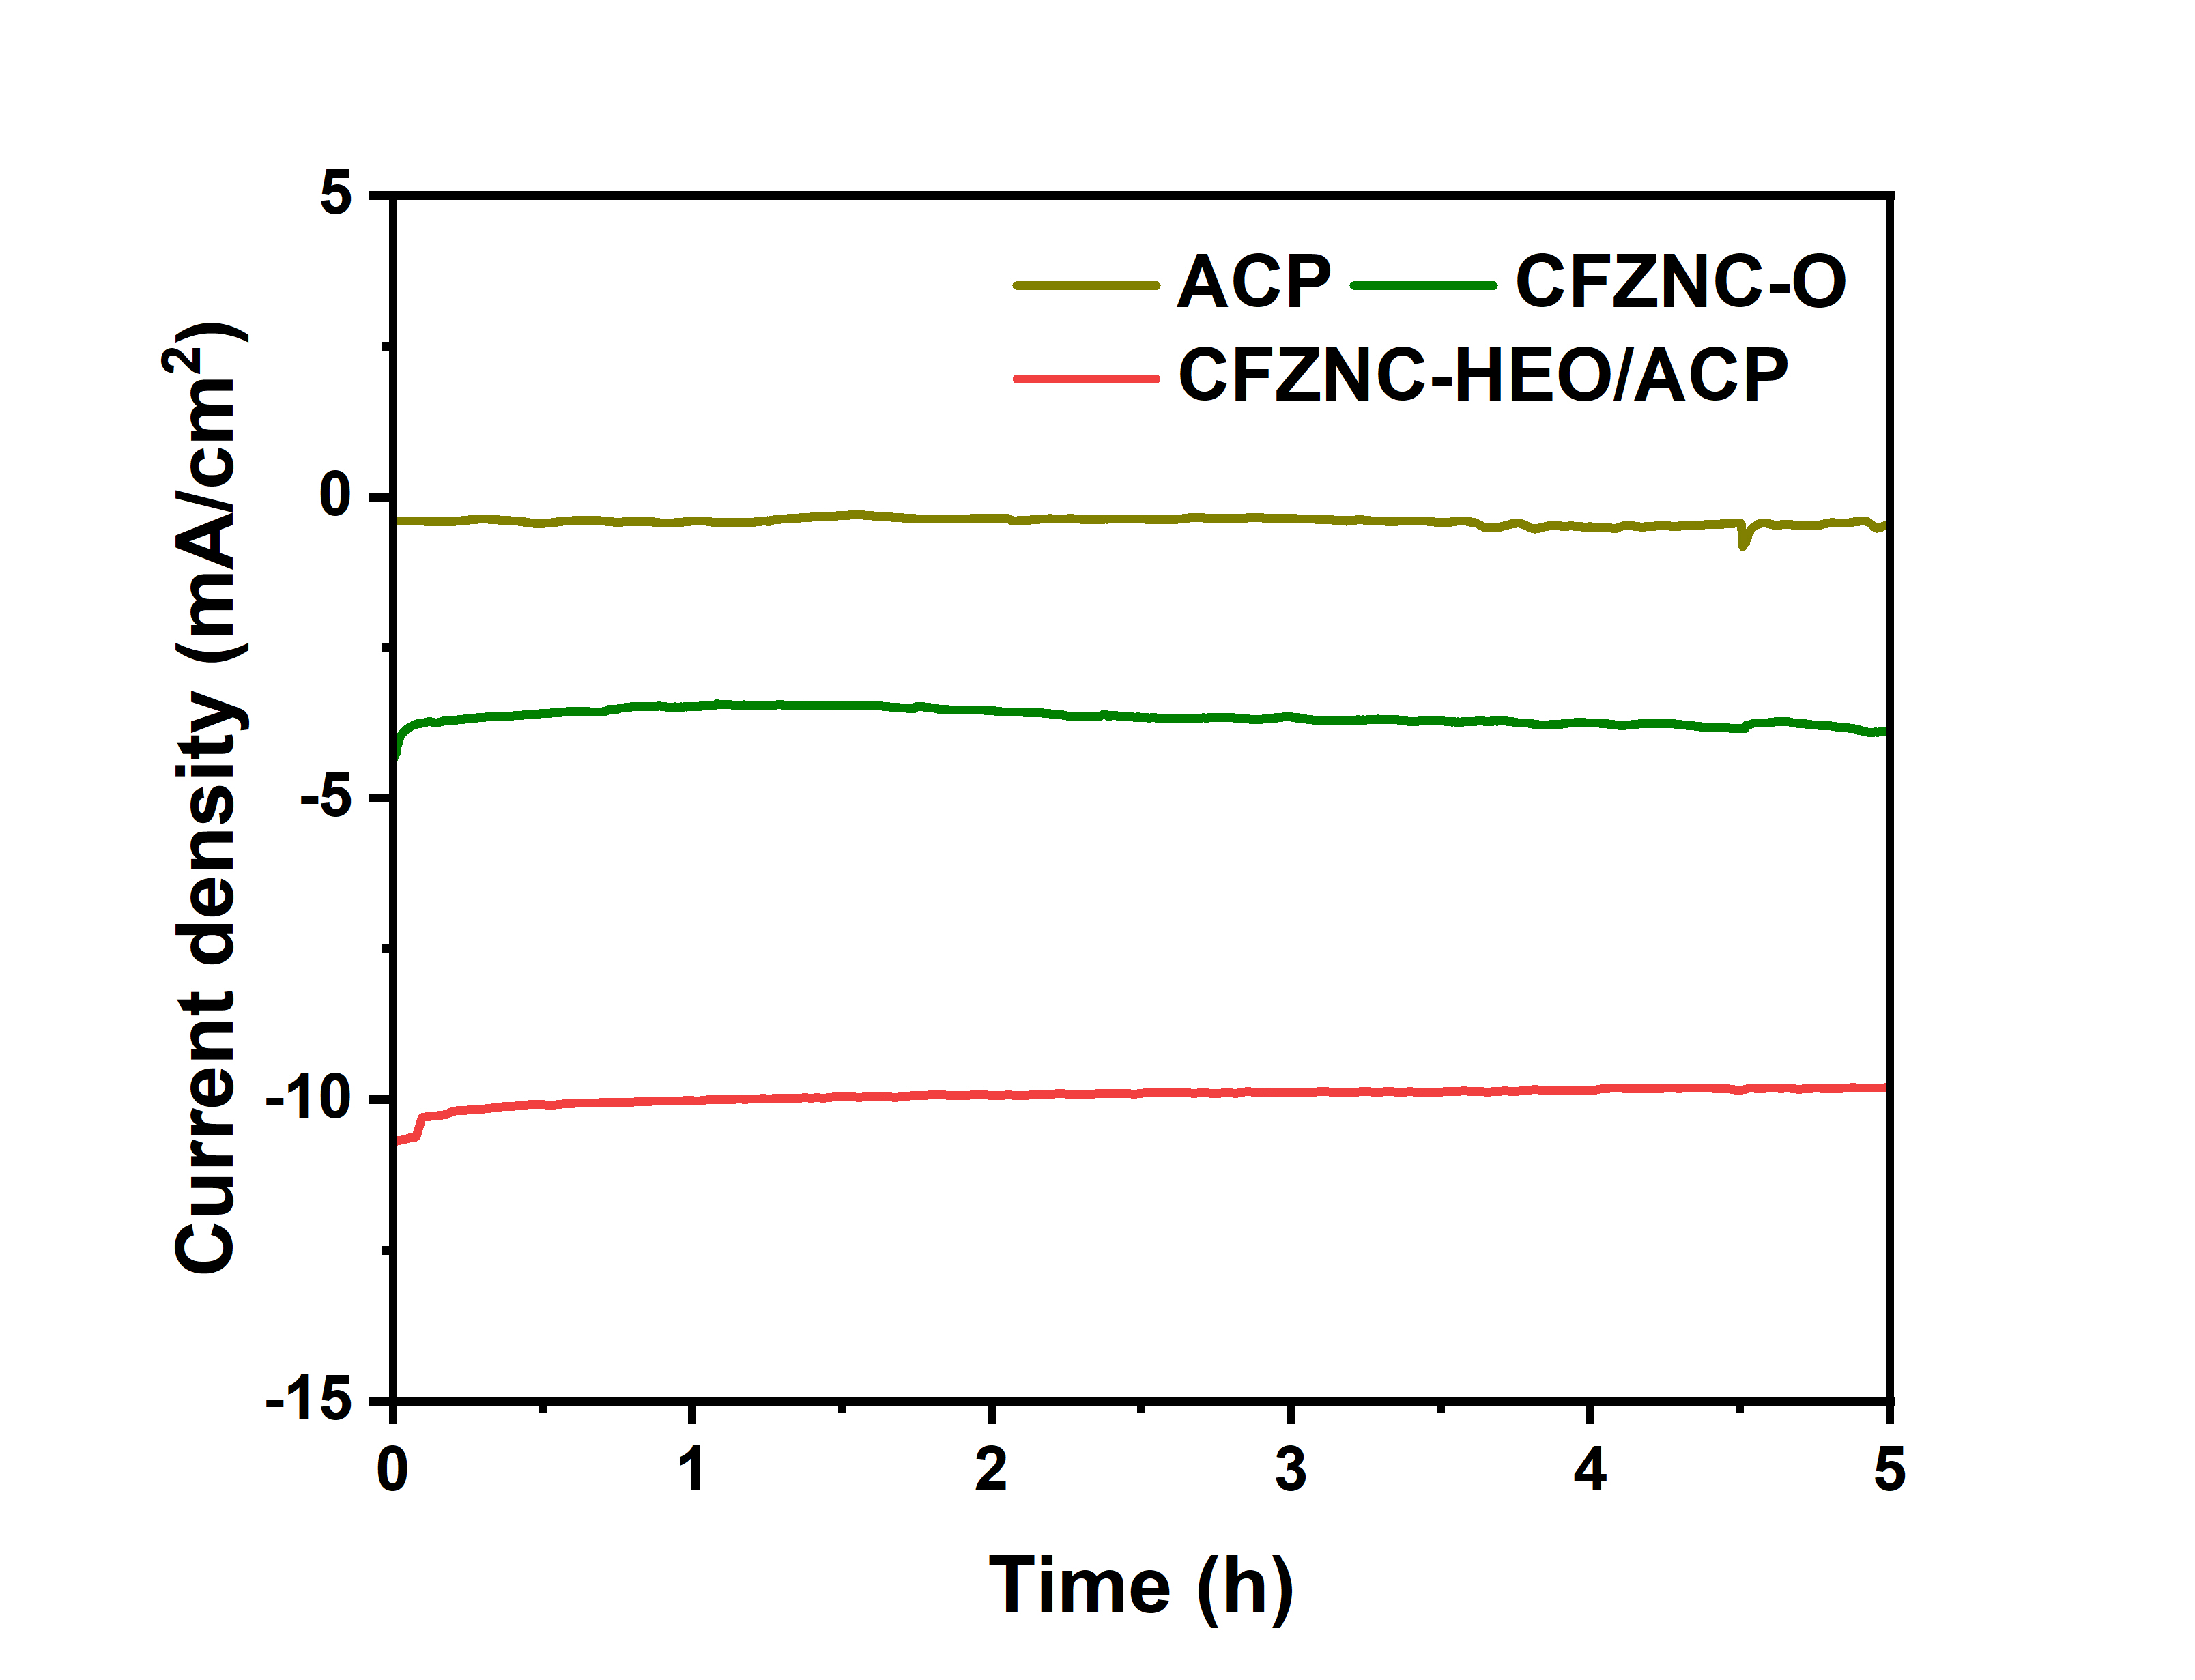


Fig. S7: Chronoamperometry test for different catalysts at -0.4 V.

**Table S1** Amount of the metal nitrate salts used to prepare multi-metal salt solution.

| Metal salt | Amount (g) |
| --- | --- |
| Cu(NO3)2.3H2O | 1.26 |
| Fe(NO3)3.9H2O | 2.10 |
| Zn(NO3)2.6H2O | 1.54 |
| Ni(NO3)2.6H2O | 1.52 |
| Co(NO3)2.6H2O | 1.52 |
| Total | 7.94 |

**Table S2** Elemental composition of the constituent metals and the calculated configurational entropies of CFZNC-O, using ICP-MS analysis.

| **Element** | **CFZNC-O** | | **CFZNC-HEA/ACP** | |
| --- | --- | --- | --- | --- |
| **Mole%** | **∆S/R** | **Mole%** | **∆S/R** |
| Cu | 12.74 | 0.26 | 27.58 | 0.36 |
| Fe | 60.57 | 0.30 | 24.14 | 0.34 |
| Zn | 5.62 | 0.16 | 13.79 | 0.27 |
| Ni | 7.57 | 0.20 | 17.24 | 0.30 |
| Co | 13.50 | 0.27 | 17.25 | 0.30 |
| **Total** |  | **1.19** |  | **1.58** |

**Table S3** Specific surface area and pore volume of the materials.

| **Surface area (m2/g)** | **Total pore volume (cc/g)** | **Micro pore volume (cc/g)** | **Macro pore volume (cc/g)** |
| --- | --- | --- | --- |
| Metal salts-impregnated polymeric powder | | | |
| 0 | 0 | 0 | 0 |
| Metal salts-impregnated polymeric powder post-carbonization | | | |
| 356 | 0.33 | 0.10 | 0.23 |
| CFZNC-HEA/ACP | | | |
| 678 | 0.47 | 0.38 | 0.09 |

**Table S4** EIS data for the different electrodes.

| **Working electrode** | **Solution resistance (Rs, Ω)** | **Charge transfer resistance (Rct, Ω)** | **Warburg Diffusion resistance (Rw, Ω)** |
| --- | --- | --- | --- |
| CFZNC-HEO/ACP | 31.2 | 101 | 13.93 |
| CFZNC-O | 30.9 | 118 | 84.03 |
| ACP | | 30.6 | 206 | 14.66 |
| CFZNC-HEA/ACP | | 29.2 | 92 | 13.15 |

**Table S5** Comparison of CO2 electroreduction to HCOO- over different catalysts in aqueous electrolytes.

| **Catalyst** | **Electrolyte** | **Applied potential** | **Current density (mA.cm-2)** | **FEHCOO- (%)** | **Reference** |
| --- | --- | --- | --- | --- | --- |
| CFZNC-HEO/ACP | 0.5 M K2SO4 | -0.4 V vs RHE | 10.75 | 98 | This study |
| Partially oxidized Co 4 atom-thick layers | 0.1 M Na2SO4 | -0.85 V vs SCE | 10.59 | 90.1 | 12 |
| Cu3NiOCs | 0.1 M KHCO3 | -0.57 V vs RHE | 10.90 | 95.9 | 13 |
| Zn2SnO4/SnO2 | 0.1 M KHCO3 | -1.08 V vs RHE | 5.72 | 77 | 14 |
| SnO2 NPs | 0.5 M NaOH | -0.8 V vs RHE | 3.00 | 67.6 | 38 |
| Bi/In bimetallic oxide NPs/carbon networks | 0.5 M KHCO3 | −0.9 V vs RHE | 8.27 | 91 | 39 |
| SnOx/AgOx | 0.1 M KHCO3 | -0.8 V vs RHE | ~9.0 | 47 | 40 |
| CeO2/Bi3NbO7 | 0.1 M KHCO3 | -1.4 V vs RHE | 14.29 | 83.13 | 41 |
| PdCuAuAgBiIn HEA Aerogel | 0.1 M KHCO3 | -1.1 V vs RHE | 8.60 | 98.1 | 42 |

**References**

1. S. Gao, Y. Lin, X. Jiao, Y. Sun, Q. Luo, W. Zhang, D. Li, J. Yang, Y. Xie, Nature **529**, 68 (2016). <https://doi.org/10.1038/nature16455>
2. D. Yang, Q. Zhu, X. Sun, C. Chen, L. Lu, W. Guo, Z. Liu, B. Han, Green Chem. **20**, 3705 (2018). <https://doi.org/10.1039/C8GC01552J>
3. K. Wang, D. Liu, P. Deng, L. Liu, S. Lu, Z. Sun, Y. Ma, Y. Wang, M. Li, B. Y. Xia, C. Xiao, S. Ding, Nano Energy **64**, 103954 (2019). <https://doi.org/10.1016/j.nanoen.2019.103954>
4. S. Lee, J. D. Ocon, Y. Son, J. Lee, J. Phys. Chem. C **119**, 4884 (2015). <https://doi.org/10.1021/jp512436w>
5. Q. Wang, X. Yang, H. Zang, F. Chen, C. Wang, N. Yu, B. Geng, Inorg. Chem. **61**, 12003 (2022). <https://doi.org/10.1021/acs.inorgchem.2c01961>
6. Y.W. Choi, F. Scholten, I. Sinev, B. Roldan Cuenya, J. Am. Chem. Soc. **141**, 5261 (2019). <https://doi.org/10.1021/jacs.8b12766>
7. L. Song, Z. Liang, M. Sun, B. Huang, Y. Du, Energy Environ. Sci. **15**, 3494 (2022). <https://doi.org/10.1039/D2EE01710E>
8. H. Li, H. Huang, Y. Chen, F. Lai, H. Fu, L. Zhang, N. Zhang, S. Bai, T. Liu, Adv. Mater. **35**, (2023). <https://doi.org/10.1002/adma.202209242>
